# Supplementary material for: Variability of Bioactive Glucosinolates, Isothiocyanates and Enzyme Patterns in Horseradish Hairy Root Cultures Initiated from Different Organs
Source: Molecules. 2019 Aug 2;24(15):2828. doi: 10.3390/molecules24152828 (PMC6696319; doi:10.3390/molecules24152828)
Supplement: Supplementary file 1 [file molecules-24-02828-s001.zip › Table_S3_0801.csv]

Sample;"Repetition";"Branching ability";"Adventitious shoots";"Extract color";"DW%";"Growth Value (daily)";"Myrosinase overall activity (on-gel)";"Myrosinase on-gel Band 1";"Myrosinase on-gel Band 2";"Myrosinase on-gel Band 3";"SIN (??g mg-1 DW)";"IBER (abundance)";"GIB (abundance)";"BRASS (abundance)";"GLN (??g mg-1 DW)";"NEO (abundance)";"ARAB (abundance)";"AITC (??g mg-1 DW)";"MeSBuCN (abundan…
Ar1;1;0;0;0;"8.08645";"0.01269";2;"NA";"NA";"NA";"0.06170";602;45;3486;"3.21527";4968;403;"0.00000";0;0;0;0;"0.00000";0;0;"0.55329";"137.56185";"231.03914";"19018.34200";"9969.28133"
Ar2;1;0;2;0;"8.58438";"0.02175";1;"NA";"NA";"NA";"0.12025";0;385;1994;"0.00000";10779;894;"0.00000";0;60778;139859;0;"0.27709";0;11806;"0.14278";"198.65047";"265.04723";"48652.16633";"14736.78300"
Ar5;1;2;0;0;"7.98536";"0.03150";0;9;44;25;"0.01586";1016;433;2417;"1.12484";6423;3125;"0.00000";0;36297;1001208;882148;"1.41270";0;2319;"0.25251";"145.74899";"215.38462";"61962.91100";"10601.70800"
Ar6;1;1;0;0;"10.43153";"0.02499";0;25;154;127;"0.00000";0;0;0;"0.00000";19350;0;"0.00000";0;74910;522378;1059190;"0.79644";0;5413;"0.21525";"148.04318";"245.61404";"57392.96400";"10373.48900"
Ar9;1;0;2;0;"12.52875";"0.01583";0;9;39;14;"0.00000";0;0;0;"0.00000";5793;0;"0.03726";0;156783;0;933898;"0.38866";0;1546;"0.13240";"247.77328";"352.06478";"49787.77300";"11840.77733"
Ar10;1;"NA";2;0;"10.89263";"0.02823";1;"NA";"NA";"NA";"0.00000";0;0;0;"0.00000";5211;0;"0.03109";0;32064;0;988378;"0.57977";0;0;"0.13064";"167.61134";"332.52362";"49371.29633";"13365.73267"
Ar11;1;0;1;0;"11.39787";"0.01670";0;0;20;0;"0.00000";0;0;0;"0.00000";3878;0;"0.00000";0;252494;328908;664270;"0.25276";0;31730;"0.10792";"170.04049";"297.97571";"43114.07733";"13164.73533"
Ar13;1;0;2;0;"11.59267";"0.08020";0;0;0;0;"0.00000";0;0;0;"0.00000";1468;0;"0.00000";0;151553;0;542272;"0.23807";0;14519;"0.20858";"100.22492";"175.92443";"40935.27700";"11926.06033"
Ar15;1;2;1;0;"11.21833";"0.04603";0;0;37;0;"0.00000";0;0;0;"0.00000";13403;0;"0.00000";0;81608;561650;696841;"0.40997";0;20740;"0.13609";"148.85290";"197.57085";"41508.11900";"9035.23367"
Ar18;1;"NA";0;0;"11.29864";"0.01781";0;0;28;0;"0.00000";0;0;0;"0.00000";5302;0;"0.00000";0;165453;0;336248;"0.18257";0;15809;"0.11429";"124.29150";"253.17139";"39225.74667";"10490.32767"
Ar23;1;0;2;0;"11.13155";"0.01119";2;0;88;144;"0.00000";0;0;0;"0.00547";3249;0;"0.02054";0;45277;467592;467592;"0.28225";0;6416;"0.20309";"137.92173";"217.54386";"51118.61133";"13630.68300"
ArL101;1;2;2;1;"10.92400";"0.04157";2;0;171;0;"0.00000";0;0;0;"0.00000";1213;0;"0.00000";0;246676;774021;0;"0.17317";0;36536;"0.17095";"101.75439";"140.35088";"33078.32433";"31365.21733"
ArL103;1;1;0;1;"10.64369";"0.00530";1;0;90;0;"0.19844";7574;1866;93199;"3.97698";84840;9211;"0.00000";0;193485;698770;771684;"0.35353";0;52127;"0.27890";"149.39271";"426.99055";"33999.36200";"38291.99933"
ArL104;1;1;2;0;"9.87306";"0.04394";0;"NA";"NA";"NA";"0.63102";611;12767;22469;"1.88255";30141;15583;"0.01563";0;47674;783173;777682;"0.40770";0;50649;"0.37684";"127.21547";"145.74899";"21008.73067";"30965.40067"
ArL108;1;2;1;0;"10.87507";"0.04593";1;0;274;0;"0.86108";5338;11492;36968;"7.82328";34513;20106;"0.00000";0;54171;926877;676167;"0.18080";0;48353;"0.29625";"529.89204";"879.35223";"26356.53500";"41720.50967"
ArL111;1;1;2;0;"11.89063";"0.03994";0;0;444;0;"0.82473";4825;4705;40590;"10.64919";41056;10607;"0.00000";0;95304;1574916;782922;"0.51295";0;45526;"0.15943";"131.17409";"154.38596";"40302.93200";"42463.15533"
ArL112;1;1;1;0;"9.89827";"0.06505";1;0;412;0;"0.09035";0;2835;2800;"0.00000";3161;732;"0.00000";0;103788;1408780;0;"0.26491";0;15428;"0.26335";"181.28655";"249.93252";"35624.22267";"34703.07733"
ArL113;1;1;2;0;"12.56674";"0.02305";0;11;217;279;"0.06441";172;211;8421;"0.35127";12043;1393;"0.00000";0;110948;472696;0;"0.08615";0;42568;"0.08908";"229.68961";"388.66397";"56746.85733";"33764.63533"
ArL116;1;2;2;2;"10.91311";"0.04105";1;37;289;352;"0.35480";880;1896;9615;"3.35266";9911;4616;"0.00000";0;0;0;0;"0.00000";0;0;"0.34143";"164.84480";"164.64238";"60836.43833";"33233.53500"
ArL119;1;0;0;0;"10.31866";"0.06882";0;0;0;0;"0.00000";0;76;48;"0.00000";9794;0;"0.00000";0;31312;697136;748391;"0.58201";0;21824;"0.33135";"123.88664";"141.43050";"42924.52600";"27849.34933"
ArL120;1;1;2;0;"10.70858";"0.02346";0;0;0;0;"0.09878";7731;870;30375;"4.53176";36319;2673;"0.00000";0;116012;825290;934662;"0.53676";0;39509;"0.30589";"151.68691";"219.16329";"71720.86467";"32258.32300"
Ar1;2;0;0;0;"8.08645";"0.01269";3;"NA";"NA";"NA";"0.04563";639;87;4409;"2.49238";4333;169;"0.00000";0;6411;346915;712186;"0.18801";0;0;"0.75279";"77.07152";"179.32524";"99281.34000";"44829.04800"
Ar2;2;0;2;0;"8.58438";"0.02175";1;"NA";"NA";"NA";"0.00881";0;104;433;"0.00000";2709;36;"0.00000";0;49603;0;0;"0.01285";0;18078;"1.00140";"239.33873";"514.36797";"127571.24000";"67748.36400"
Ar5;2;2;0;0;"7.98536";"0.03150";3;0;33;0;"0.00684";370;204;1210;"0.55326";4002;1727;"0.00000";0;29226;692652;1096129;"0.48998";0;10862;"0.93738";"197.54386";"366.85560";"117851.59300";"74476.03400"
Ar6;2;1;0;0;"10.43153";"0.02499";2;0;115;38;"0.00000";0;0;0;"0.00000";6879;0;"0.00080";0;32663;478252;615428;"0.07371";0;3939;"0.78260";"212.25371";"343.31984";"103260.27600";"64358.27000"
Ar9;2;0;2;0;"12.52875";"0.01583";3;0;73;0;"0.00000";0;0;0;"0.00000";3987;0;"0.00155";0;179000;298282;670542;"0.06491";0;8052;"1.39548";"174.97976";"514.97976";"100553.81800";"59757.22700"
Ar10;2;"NA";2;0;"10.89263";"0.02823";2;"NA";"NA";"NA";"0.00000";0;0;0;"0.00000";12188;0;"0.00000";0;193563;0;582288;"0.05512";0;10244;"0.47696";"353.14440";"591.09312";"104020.13500";"62566.13700"
Ar11;2;0;1;0;"11.39787";"0.01670";0;0;17;0;"0.00000";0;0;0;"0.00000";9239;0;"0.00227";0;140813;0;1017572;"0.16240";0;6744;"0.75700";"212.14575";"462.07827";"111839.77500";"67801.33000"
Ar13;2;0;2;0;"11.59267";"0.08020";0;0;19;0;"0.00000";0;0;0;"0.00000";1770;0;"0.00032";0;52474;0;578774;"0.05814";0;5766;"0.48281";"306.88259";"469.63563";"132780.09200";"75201.09500"
Ar15;2;2;1;0;"11.21833";"0.04603";0;0;18;0;"0.00000";0;0;0;"0.00000";2867;0;"0.00120";0;140325;406203;1476783;"0.21191";0;2023;"0.81050";"193.25236";"233.19838";"116610.05700";"51503.57800"
Ar18;2;"NA";0;0;"11.29864";"0.01781";0;0;53;0;"0.00000";0;0;0;"0.00000";9219;0;"0.00317";0;155972;403919;716461;"0.06689";0;20678;"0.66015";"124.96626";"184.61538";"122090.69000";"50105.38000"
Ar23;2;0;2;0;"11.13155";"0.01119";0;0;120;99;"0.00000";0;0;0;"0.00000";2577;0;"0.00000";0;18596;0;0;"0.01363";0;7351;"0.53984";"204.04858";"290.41835";"150150.67800";"61081.96000"
ArL101;2;2;2;1;"10.92400";"0.04157";0;0;121;3;"0.00000";0;0;0;"0.00000";1713;0;"0.00000";0;77871;360230;508618;"0.06160";0;12512;"0.68474";"148.58300";"228.34008";"130560.73000";"40021.28300"
ArL103;2;1;0;1;"10.64369";"0.00530";2;0;104;0;"0.06083";0;349;22331;"0.10051";20508;1139;"0.00102";0;170949;839641;829962;"0.10005";0;22804;"0.63532";"218.62348";"385.96491";"138632.51000";"47035.49600"
ArL104;2;1;2;0;"9.87306";"0.04394";"NA";"NA";"NA";"NA";"0.10149";0;1113;2558;"0.10842";12612;1721;"0.00000";0;24938;593077;440418;"0.04023";0;29911;"0.45049";"166.93657";"211.06613";"138363.70000";"42823.49600"
ArL108;2;2;1;0;"10.87507";"0.04593";2;0;244;0;"0.00000";0;184;134;"0.00000";4801;0;"0.00000";0;62335;585337;0;"0.01558";0;34638;"0.83935";"184.34548";"319.56815";"140852.83200";"52838.19400"
ArL111;2;1;2;0;"11.89063";"0.03994";2;0;447;0;"0.11186";141;962;7657;"0.34046";12539;1252;"0.00000";0;67457;960783;294562;"0.02824";0;19864;"0.77797";"241.83536";"240.21592";"163756.40700";"62805.92200"
ArL112;2;1;1;0;"9.89827";"0.06505";2;0;513;0;"0.00000";0;99;0;"0.00000";5182;0;"0.00000";0;66948;738915;355113;"0.04422";0;23862;"0.57123";"183.80567";"202.42915";"159912.69300";"60849.38700"
ArL113;2;1;2;0;"12.56674";"0.02305";1;23;175;217;"0.00000";0;0;0;"0.00000";9674;0;"0.00000";0;126548;424121;0;"0.01430";0;30659;"0.60555";"195.54656";"334.14305";"185964.90500";"55013.80100"
ArL116;2;2;2;2;"10.91311";"0.04105";1;49;243;328;"0.05751";0;485;2626;"0.05451";8552;505;"0.00000";0;50912;595145;0;"0.01570";0;26508;"0.89429";"170.71525";"290.95816";"181044.62200";"51930.95200"
ArL119;2;0;0;0;"10.31866";"0.06882";1;0;0;0;"0.00000";0;0;0;"0.00000";10605;0;"0.00000";0;12158;731839;483094;"0.06628";0;25767;"0.88889";"139.54116";"282.32119";"168933.29100";"62639.33700"
ArL120;2;1;2;0;"10.70858";"0.02346";1;0;0;0;"0.00000";0;176;2868;"0.00000";3059;0;"0.00000";0;116294;662815;549624;"0.04191";0;30588;"0.57663";"157.35493";"320.64777";"170088.15300";"59614.68000"
Ar1;3;0;0;0;"8.08645";"0.01269";"NA";"NA";"NA";"NA";"0.33469";3665;284;16166;"16.88951";25563;1274;"0.00000";0;52398;0;0;"0.39198";0;0;"NA";"NA";"NA";"NA";"NA"
Ar2;3;0;2;0;"8.58438";"0.02175";"NA";"NA";"NA";"NA";"0.09447";0;695;2865;"0.00000";11285;824;"0.00000";0;41555;"106753.076923077";0;"0.44616";0;9151;"NA";"NA";"NA";"NA";"NA"
Ar5;3;2;0;0;"7.98536";"0.03150";1;0;50;0;"0.21005";18161;3232;33286;"18.37495";48616;24487;"0.00000";0;57869;333086;284809;"1.34511";0;10807;"NA";"NA";"NA";"NA";"NA"
Ar6;3;1;0;0;"10.43153";"0.02499";3;0;136;74;"0.00000";0;126;289;"0.00000";35781;0;"0.00360";0;50129;480584;822582;"1.07259";0;10169;"NA";"NA";"NA";"NA";"NA"
Ar9;3;0;2;0;"12.52875";"0.01583";1;0;69;2;"0.00000";0;0;0;"0.00000";27860;0;"0.00261";0;362200;341755;329103;"0.68210";0;6648;"NA";"NA";"NA";"NA";"NA"
Ar10;3;"NA";2;0;"10.89263";"0.02823";"NA";"NA";"NA";"NA";"0.00000";0;191;205;"0.00000";27677;0;"0.00000";0;55395;0;414916;"0.64139";0;3387;"NA";"NA";"NA";"NA";"NA"
Ar11;3;0;1;0;"11.39787";"0.01670";1;0;31;0;"0.00000";0;0;0;"0.00000";38608;0;"0.00000";0;184568;0;713729;"0.52270";0;9902;"NA";"NA";"NA";"NA";"NA"
Ar13;3;0;2;0;"11.59267";"0.08020";1;0;17;0;"0.00000";0;0;0;"0.00000";14537;0;"0.00447";0;154861;0;544097;"0.75679";0;13556;"NA";"NA";"NA";"NA";"NA"
Ar15;3;2;1;0;"11.21833";"0.04603";1;0;85;0;"0.00000";0;0;0;"0.00000";15035;0;"0.00120";0;150317;0;1277942;"1.43061";0;6418;"NA";"NA";"NA";"NA";"NA"
Ar18;3;"NA";0;0;"11.29864";"0.01781";1;0;40;0;"0.00000";0;0;115;"0.00000";16121;0;"0.00478";0;129165;403567;430686;"0.50757";0;17046;"NA";"NA";"NA";"NA";"NA"
Ar23;3;0;2;0;"11.13155";"0.01119";2;0;137;89;"0.00000";0;0;0;"0.00000";10096;0;"0.00000";0;101704;0;0;"0.36390";0;9516;"NA";"NA";"NA";"NA";"NA"
ArL101;3;2;2;1;"10.92400";"0.04157";2;0;130;2;"0.00000";0;119;720;"0.00000";62400;0;"0.00000";0;28784;318034;349505;"0.49346";0;9568;"NA";"NA";"NA";"NA";"NA"
ArL103;3;1;0;1;"10.64369";"0.00530";1;0;77;0;"0.42330";10909;2580;140600;"7.95327";130237;13232;"0.00132";0;119184;621711;929586;"0.93244";0;15543;"NA";"NA";"NA";"NA";"NA"
ArL104;3;1;2;0;"9.87306";"0.04394";"NA";"NA";"NA";"NA";"0.53435";0;4427;16190;"0.82020";51026;8938;"0.00000";0;56746;521147;447385;"0.34071";0;23445;"NA";"NA";"NA";"NA";"NA"
ArL108;3;2;1;0;"10.87507";"0.04593";2;0;262;0;"0.00000";0;1294;1306;"0.00000";27584;378;"0.00132";0;60219;582202;737024;"0.68545";0;18125;"NA";"NA";"NA";"NA";"NA"
ArL111;3;1;2;0;"11.89063";"0.03994";2;0;431;0;"0.91574";7027;6177;53380;"14.16262";63183;14687;"0.00349";0;128995;870645;593456;"0.90134";0;22227;"NA";"NA";"NA";"NA";"NA"
ArL112;3;1;1;0;"9.89827";"0.06505";2;0;427;0;"0.16708";0;3868;3610;"0.00000";35022;924;"0.00000";0;83428;584286;0;"0.28878";0;17201;"NA";"NA";"NA";"NA";"NA"
ArL113;3;1;2;0;"12.56674";"0.02305";3;30;207;260;"0.00000";0;143;4681;"0.00000";32379;0;"0.00000";0;185642;400541;0;"0.18235";0;20270;"NA";"NA";"NA";"NA";"NA"
ArL116;3;2;2;2;"10.91311";"0.04105";3;37;274;354;"0.78992";2549;6944;25529;"5.09944";48884;9951;"0.00410";0;95988;642320;569821;"0.99133";0;11005;"NA";"NA";"NA";"NA";"NA"
ArL119;3;0;0;0;"10.31866";"0.06882";0;0;0;0;"0.00000";0;0;0;"0.00000";22086;0;"0.00000";0;34579;978366;629389;"0.66752";0;23823;"NA";"NA";"NA";"NA";"NA"
ArL120;3;1;2;0;"10.70858";"0.02346";0;0;0;0;"0.29626";14089;2864;74447;"11.51204";108448;6618;"0.00000";0;127104;579194;566144;"0.45946";0;7416;"NA";"NA";"NA";"NA";"NA"
